# Supplementary material for: Grandparental retirement and intergenerational transfers: Evidence from The Irish Longitudinal Study on Ageing (TILDA)
Source: Research Square preprint supplement (doi:10.21203/rs.3.rs-6856141/v1), 2025-06-20

# APPENDICES

**Table A1 Sample selection**

|  | people |  | year-to-person observations | |
| --- | --- | --- | --- | --- |
| Participants aged 50-79 | 7815 |  | 28904 |  |
| Ever changed address | 344 | 4.4% | 1534 | 5.3% |
| Living in nursing house | 88 | 1.1% | 358 | 1.2% |
|  |  |  |  |  |
| Has no children | 1269 | 16.2% | 3916 | 13.5% |
| Has minor children under 18 | 1001 | 12.8% | 2270 | 7.9% |
| Has children over 50 | 1065 | 13.6% | 1917 | 6.6% |
|  |  |  |  |  |
| Never worked | 779 | 10.0% | 2683 | 9.3% |
| Permanently sick/disabled | 420 | 5.4% | 1460 | 5.1% |
| Unemployed | 711 | 9.1% | 1150 | 4.0% |

Note: there are overlapping cases across groups. The percentage numbers give the proportion of each group in all observations aged between 50 and 79.

**Table A2 Sample characteristics**

|  | All | Retired | Non-retired | T-diff |
| --- | --- | --- | --- | --- |
|  | (N=13,437) | (N=7,450) | (N=5,987) | (p-value) |
| **Individual characteristics** |  |  |  |  |
| Age | 64.52 | 67.73 | 60.52 | <0.000 |
| Partner’s age | 64.02 | 66.99 | 60.58 | <0.000 |
| Male | 0.456 | 0.443 | 0.472 | 0.001 |
| Married | 0.817 | 0.796 | 0.844 | <0.000 |
| Widowed | 0.107 | 0.146 | 0.060 | <0.000 |
| Education: primary/none | 0.207 | 0.243 | 0.161 | <0.000 |
| Education: secondary | 0.427 | 0.406 | 0.453 | <0.000 |
| Education: third/higher | 0.366 | 0.350 | 0.386 | <0.000 |
| Dublin | 0.245 | 0.266 | 0.218 | <0.000 |
| Other cities/towns | 0.283 | 0.302 | 0.260 | <0.000 |
| Rural | 0.472 | 0.432 | 0.522 | <0.000 |
| Household gross assets (in 1000 euro) | 488.9 | 463.3 | 520.4 | <0.000 |
| Self-rated health: excellent | 0.173 | 0.153 | 0.198 | <0.000 |
| Self-rated health: good | 0.371 | 0.351 | 0.396 | <0.000 |
| Self-rated health: average | 0.329 | 0.336 | 0.319 | 0.032 |
| Self-rated health: fair/poor | 0.110 | 0.134 | 0.079 | <0.000 |
| Public sector | 0.346 | 0.35 | 0.341 | 0.311 |
| Self-employed/farming | 0.143 | 0.056 | 0.277 | <0.000 |
| Household size | 2.38 | 2.12 | 2.79 | <0.000 |
| **Children’s characteristics** |  |  |  |  |
| The number of children | 3.24 | 3.34 | 3.12 | <0.000 |
| The number of grandchildren | 3.20 | 4.12 | 2.06 | <0.000 |
| The number of sons | 1.57 | 1.61 | 1.53 | <0.000 |
| Mean age | 33.94 | 36.70 | 30.51 | <0.000 |
| Proximity: co-residence | 0.354 | 0.258 | 0.474 | <0.000 |
| Proximity: the same county | 0.468 | 0.553 | 0.363 | <0.000 |
| Proximity: another county | 0.126 | 0.133 | 0.118 | 0.012 |
| Proximity: another country | 0.051 | 0.056 | 0.045 | 0.005 |
| Has a degree or above | 0.509 | 0.515 | 0.501 | 0.037 |
| Employed | 0.788 | 0.809 | 0.761 | <0.000 |
| Full-time employed | 0.657 | 0.668 | 0.643 | <0.000 |
| Part-time employed | 0.081 | 0.084 | 0.077 | 0.025 |
| Self-employed | 0.049 | 0.057 | 0.040 | <0.000 |
| Unemployed | 0.063 | 0.059 | 0.068 | 0.001 |
| In education or training | 0.079 | 0.046 | 0.120 | <0.000 |
| Looking after home | 0.045 | 0.060 | 0.025 | <0.000 |
| Married | 0.529 | 0.617 | 0.419 | <0.000 |

Note: The working sample includes 13,437 wave-to-person observations (4,342 people, 2,040 males, 2,302 females, 3,276 households) aged between 50 and 79 during all TILDA five waves (2009-2018).

**Table A3 First stage regression**

|  | (1) | (2) | (3) |
| --- | --- | --- | --- |
|  | All | Male | Female |
| SPA eligibility | 0.179*** | 0.212*** | 0.144*** |
|  | (0.015) | (0.023) | (0.020) |
| Age | 0.075*** | 0.139*** | 0.044** |
|  | (0.014) | (0.018) | (0.020) |
| Age-squared/100 | -0.041*** | -0.088*** | -0.017 |
|  | (0.011) | (0.014) | (0.015) |
| Male | -0.116*** |  |  |
|  | (0.012) |  |  |
| (Ref: Married) |  |  |  |
| Never married | -0.145** | -0.047 | -0.167** |
|  | (0.065) | (0.074) | (0.083) |
| Separated/divorced | -0.125*** | 0.005 | -0.163*** |
|  | (0.035) | (0.049) | (0.045) |
| Widowed | -0.022 | 0.014 | -0.030 |
|  | (0.032) | (0.044) | (0.044) |
| (Ref: Education: Primary/none) |  |  |  |
| Education: secondary | 0.020 | 0.055** | -0.037 |
|  | (0.017) | (0.022) | (0.025) |
| Education: third level/higher | 0.010 | 0.106*** | -0.102*** |
|  | (0.019) | (0.026) | (0.027) |
| (Ref: Dublin) |  |  |  |
| Other cities/towns | -0.002 | 0.012 | -0.007 |
|  | (0.017) | (0.022) | (0.023) |
| Rural area | -0.055*** | -0.081*** | -0.018 |
|  | (0.016) | (0.021) | (0.022) |
| Whether born in Ireland | -0.016 | 0.016 | -0.017 |
|  | (0.022) | (0.030) | (0.029) |
| (Ref: Health condition: excellent) |  |  |  |
| Childhood health: average | 0.003 | -0.014 | 0.019 |
|  | (0.013) | (0.018) | (0.018) |
| Childhood health: fair/poor | 0.077*** | 0.036 | 0.097*** |
|  | (0.027) | (0.039) | (0.036) |
| (Ref: Financial condition: well-off) |  |  |  |
| Childhood financial condition: average | 0.015 | 0.019 | 0.013 |
|  | (0.020) | (0.029) | (0.027) |
| Childhood financial condition: poor | 0.036 | 0.067** | -0.003 |
|  | (0.025) | (0.033) | (0.035) |
| The number of children | -0.003 | -0.014* | 0.008 |
|  | (0.007) | (0.008) | (0.008) |
| Son ratio | -0.016 | -0.016 | -0.020 |
|  | (0.020) | (0.027) | (0.027) |
| Children's mean age | -0.004 | 0.024 | -0.036 |
|  | (0.017) | (0.022) | (0.023) |
| Children's mean age squared/100 | 0.015 | -0.006 | 0.041* |
|  | (0.016) | (0.021) | (0.023) |
| Observations | 13,437 | 6,128 | 7,309 |
| Household clusters | 3,276 | 2,040 | 2,302 |
| R-squared | 0.339 | 0.424 | 0.294 |

Note: * p<0.1, **p<0.05, *** p<0.01. Standard errors clustered at household level are in bracket.

Some variables are not displayed: partner’s age groups, partner’s education group, children’s age groups, and wave dummies.

**Table A4 Characteristics of compliers**

| Covariate | Mean | | | | Balance test |
| --- | --- | --- | --- | --- | --- |
|  | Sample | Compliers | Always-takers | Never-takers | (P-value) |
| Age | 64.52 | 64.62 | 62.20 | 70.69 | <0.000 |
| Male | 0.456 | 0.511 | 0.303 | 0.671 | <0.000 |
| Married | 0.817 | 0.785 | 0.855 | 0.838 | <0.000 |
| Education: primary/none | 0.207 | 0.209 | 0.165 | 0.315 | <0.000 |
| Education: secondary | 0.427 | 0.407 | 0.466 | 0.394 | <0.000 |
| Education: third/higher | 0.366 | 0.383 | 0.368 | 0.291 | <0.000 |
| Dublin | 0.245 | 0.245 | 0.259 | 0.203 | <0.000 |
| Other cities or towns | 0.283 | 0.303 | 0.285 | 0.203 | 0.002 |
| Rural area | 0.472 | 0.453 | 0.456 | 0.594 | <0.000 |
| Born in Ireland | 0.915 | 0.916 | 0.906 | 0.936 | 0.120 |
| The number of children | 3.24 | 3.22 | 3.18 | 3.52 | <0.000 |
| Son ratio | 0.483 | 0.480 | 0.478 | 0.507 | 0.267 |
| Children’s mean age | 33.94 | 34.00 | 32.66 | 37.32 | <0.000 |
| Childhood health: excellent | 0.588 | 0.582 | 0.595 | 0.589 | <0.000 |
| Childhood health: average | 0.361 | 0.375 | 0.347 | 0.350 | <0.000 |
| Childhood health: fair/poor | 0.051 | 0.043 | 0.058 | 0.060 | <0.000 |
| Childhood SES: well-off | 0.110 | 0.117 | 0.103 | 0.107 | 0.175 |
| Childhood SES: average | 0.705 | 0.682 | 0.727 | 0.735 | <0.000 |
| Childhood SES: poor | 0.184 | 0.201 | 0.171 | 0.158 | <0.000 |
| Public sector | 0.337 | 0.388 | 0.351 | 0.103 | 0.129 |
| Private sector | 0.448 | 0.429 | 0.537 | 0.279 | 0.634 |
| Self-employment/farming | 0.214 | 0.182 | 0.618 | 0.112 | 0.238 |
| Professionals/managerial | 0.346 | 0.340 | 0.422 | 0.328 | 0.006 |
| Non-manual | 0.310 | 0.292 | 0.341 | 0.291 | 0.043 |
| Skilled | 0.150 | 0.171 | 0.118 | 0.157 | 0.053 |
| Semi-skilled/unskilled | 0.165 | 0.176 | 0.178 | 0.091 | 0.898 |

Note: We implement the method by Marbach and Hangartner (2020) to profile the compliers. The observed always-takers (36.5% of the whole sample) are below SPA and retired. The observed never-takers (17.5%) are working beyond SPA. The potential compliers around 50.7% of the whole sample. The balance test in the last column tests the mean of a covariate by SPA eligibility.

**Table A5 The coefficients of other covariates in regression of children’s employment and fertility**

|  | (1) | (2) | (3) | (4) | (5) |
| --- | --- | --- | --- | --- | --- |
| Outcome: | F-T employed | P-T employed | Home maker | Married | Grandchildren |
| Retirement | -0.117** | 0.036 | 0.049* | 0.014 | 1.592*** |
|  | (0.059) | (0.035) | (0.029) | (0.056) | (0.538) |
| Age | 0.012 | -0.004 | -0.003 | -0.008 | -0.147* |
|  | (0.011) | (0.006) | (0.005) | (0.011) | (0.087) |
| Age-squared/100 | -0.005 | 0.0021 | 0.001 | 0.0041 | 0.060 |
|  | (0.008) | (0.005) | (0.004) | (0.008) | (0.067) |
| Male | 0.003 | -0.003 | 0.005 | 0.005 | 0.181** |
|  | (0.010) | (0.005) | (0.005) | (0.009) | (0.089) |
| (Ref: Married) |  |  |  |  |  |
| Never married | -0.090 | -0.001 | 0.002 | -0.140*** | 0.500 |
|  | (0.072) | (0.026) | (0.026) | (0.053) | (0.366) |
| Separated/divorced | -0.080*** | 0.009 | 0.001 | -0.055** | -0.068 |
|  | (0.028) | (0.014) | (0.010) | (0.027) | (0.227) |
| Widowed | -0.039* | 0.007 | -0.008 | -0.063*** | -0.657*** |
|  | (0.024) | (0.012) | (0.011) | (0.023) | (0.209) |
| (Ref: Education: Primary/none) |  |  |  |  |  |
| Education: secondary | 0.052*** | -0.011* | -0.021*** | -0.004 | -0.328*** |
|  | (0.012) | (0.007) | (0.006) | (0.012) | (0.112) |
| Education: third level | 0.055*** | -0.013* | -0.031*** | -0.011 | -0.662*** |
|  | (0.013) | (0.007) | (0.006) | (0.013) | (0.118) |
| (Ref: Dublin) |  |  |  |  |  |
| Other cities/towns | -0.005 | 0.009 | -0.008 | -0.035** | -0.075 |
|  | (0.013) | (0.007) | (0.006) | (0.014) | (0.115) |
| Rural area | 0.022* | 0.011 | -0.021*** | -0.037*** | -0.152 |
|  | (0.013) | (0.007) | (0.006) | (0.013) | (0.112) |
| Whether born in Ireland | 0.056*** | -0.028** | -0.015** | -0.003 | -0.095 |
|  | (0.017) | (0.012) | (0.007) | (0.017) | (0.153) |
| The number of children | -0.002 | 0.00001 | 0.0001 | -0.005 | 1.337*** |
|  | (0.005) | (0.002) | (0.002) | (0.004) | (0.074) |
| (Ref: Age group 40-49) |  |  |  |  |  |
| Children age group: 19-24 | 0.266*** | 0.027 | 0.001 | 0.083** | 1.820*** |
|  | (0.042) | (0.027) | (0.014) | (0.035) | (0.293) |
| Children age group: 25-29 | 0.398*** | -0.008 | -0.018 | 0.014 | 0.206 |
|  | (0.028) | (0.016) | (0.011) | (0.028) | (0.224) |
| Children age group: 30-34 | 0.280*** | -0.017 | -0.019* | 0.131*** | -0.179 |
|  | (0.025) | (0.015) | (0.010) | (0.026) | (0.198) |
| Children age group: 35-39 | 0.119*** | -0.012 | -0.001 | 0.144*** | 0.468*** |
|  | (0.021) | (0.012) | (0.010) | (0.021) | (0.160) |
| % of son | 0.113*** | -0.069*** | -0.068*** | 0.018 | -0.232* |
|  | (0.017) | (0.009) | (0.007) | (0.017) | (0.126) |
| Children's mean age | 0.106*** | 0.001 | 0.006 | 0.076*** | 0.476*** |
|  | (0.015) | (0.009) | (0.006) | (0.014) | (0.130) |
| Children's mean age squared/100 | -0.117*** | -0.004 | -0.007 | -0.066*** | -0.020 |
|  | (0.018) | (0.012) | (0.007) | (0.016) | (0.136) |
| R-squared | 0.152 | 0.022 | 0.086 | 0.393 | 0.554 |

Note: * p<0.1, **p<0.05, *** p<0.01. Standard errors clustered at household level are in bracket.

Some variables are not displayed: partner’s age groups, partner’s education group, children’s maximum and minimum age, early childhood health/financial conditions and wave dummies.

**Table A6 The coefficients of other covariates in regression of financial and time transfers**

|  | (1) | (2) | (3) | (4) |
| --- | --- | --- | --- | --- |
| *Outcome:* | Lump sum | Small Transfer | Chores | Grandparenting |
| Retirement | 0.146* | 0.060 | 0.076 | 0.041 |
|  | (0.088) | (0.091) | (0.087) | (0.093) |
| Age | 0.052*** | -0.012 | -0.008 | -0.019 |
|  | (0.016) | (0.015) | (0.015) | (0.016) |
| Age-squared/100 | -0.042*** | 0.005 | -0.002 | 0.006 |
|  | (0.011) | (0.011) | (0.011) | (0.012) |
| Male | 0.043*** | 0.021 | 0.053*** | -0.010 |
|  | (0.013) | (0.014) | (0.013) | (0.014) |
| (Ref: Married) |  |  |  |  |
| Never married | -0.196*** | -0.174*** | -0.077 | -0.229*** |
|  | (0.050) | (0.066) | (0.064) | (0.067) |
| Separated/divorced | -0.092** | -0.005 | 0.008 | -0.040 |
|  | (0.036) | (0.035) | (0.034) | (0.041) |
| Widowed | -0.037 | -0.024 | -0.003 | -0.052 |
|  | (0.033) | (0.031) | (0.030) | (0.036) |
| (Ref: Education: Primary/none) |  |  |  |  |
| Education: secondary | 0.057*** | 0.063*** | 0.017 | 0.001 |
|  | (0.013) | (0.015) | (0.015) | (0.016) |
| Education: third level | 0.160*** | 0.109*** | 0.001 | -0.053*** |
|  | (0.016) | (0.016) | (0.016) | (0.018) |
| (Ref: Dublin) |  |  |  |  |
| Other cities/towns | -0.057*** | -0.027 | -0.039** | -0.056*** |
|  | (0.019) | (0.018) | (0.018) | (0.019) |
| Rural area | -0.090*** | -0.070*** | -0.055*** | -0.076*** |
|  | (0.018) | (0.017) | (0.017) | (0.018) |
| Whether born in Ireland | 0.041** | 0.035* | 0.018 | 0.017 |
|  | (0.020) | (0.021) | (0.018) | (0.022) |
| The number of children | 0.012* | -0.003 | 0.004 | 0.031*** |
|  | (0.007) | (0.006) | (0.006) | (0.007) |
| (Ref: Age group 40-49) |  |  |  |  |
| Children age group: 19-24 | 0.083 | 0.022 | -0.007 | 0.109* |
|  | (0.107) | (0.068) | (0.071) | (0.063) |
| Children age group: 25-29 | -0.066 | -0.067 | 0.002 | -0.002 |
|  | (0.067) | (0.047) | (0.049) | (0.045) |
| Children age group: 30-34 | -0.011 | -0.086** | 0.049 | 0.101*** |
|  | (0.048) | (0.039) | (0.038) | (0.039) |
| Children age group: 35-39 | -0.037 | -0.045 | 0.106*** | 0.133*** |
|  | (0.036) | (0.034) | (0.031) | (0.033) |
| % of son | -0.024 | -0.027 | -0.097*** | -0.084*** |
|  | (0.021) | (0.020) | (0.019) | (0.024) |
| Children's mean age | -0.051** | -0.046** | 0.003 | 0.143*** |
|  | (0.025) | (0.022) | (0.021) | (0.022) |
| Children's mean age squared/100 | 0.051* | 0.020 | -0.002 | -0.160*** |
|  | (0.029) | (0.025) | (0.024) | (0.026) |
| Observations | 10,145 | 12,987 | 13,219 | 10,399 |
| Household clusters | 2,796 | 3,237 | 3,255 | 3,019 |
| R-squared | 0.084 | 0.062 | 0.040 | 0.226 |

Note: * p<0.1, **p<0.05, *** p<0.01. Standard errors clustered at household level are in bracket.

Some variables are not displayed: partner’s age groups, partner’s education group, children’s maximum and minimum age, early childhood health/financial conditions and wave dummies.

**Table A7 Non-IV estimation of retirement on intergenerational outcomes**

|  | (1) | (2) | (3) | (4) | (5) | (6) |
| --- | --- | --- | --- | --- | --- | --- |
| Panel A: whether has transfer | | | | | | |
|  | Lump sum | Small transfer | Chores | Childcare | Transfer | Help |
|  | (>5000) | (250-5000) |  |  | (Received) | (Received) |
| All | -0.007 | -0.012 | 0.034*** | 0.018 | -0.002 | -0.005 |
|  | (0.012) | (0.013) | (0.012) | (0.016) | (0.005) | (0.012) |
| N | 10,145 | 12,987 | 13,219 | 8,995 | 13,354 | 12,965 |
| Male | -0.021 | 0.024 | 0.027 | -0.015 | -0.001 | -0.036** |
|  | (0.019) | (0.019) | (0.019) | (0.023) | (0.008) | (0.018) |
| N | 4,567 | 5,919 | 6,035 | 4,125 | 6,084 | 5,925 |
| Female | 0.001 | -0.034** | 0.035** | 0.048** | -0.002 | 0.022 |
|  | (0.015) | (0.016) | (0.015) | (0.020) | (0.008) | (0.015) |
| N | 5,578 | 7,068 | 7,184 | 4,870 | 7,255 | 7,040 |
| Panel B: the intensity of transfer (log) | | | | | | |
|  | Lump sum | Small transfer | Chores | Childcare | Transfer | Help |
|  | (>5000) | (250-5000) |  |  | (Received) | (Received) |
| All | 0.029 | -0.061* | 0.074 | 0.188*** | -0.022 | -0.063 |
|  | (0.049) | (0.035) | (0.049) | (0.043) | (0.094) | (0.048) |
| N | 2,684 | 6,191 | 3,941 | 5,936 | 765 | 3,494 |
| Male | 0.025 | -0.075 | -0.018 | -0.036 | 0.030 | -0.198*** |
|  | (0.082) | (0.056) | (0.071) | (0.065) | (0.166) | (0.074) |
| N | 1,261 | 2,833 | 1,910 | 2,668 | 302 | 1,519 |
| Female | 0.043 | -0.058 | 0.131** | 0.322*** | -0.018 | -0.004 |
|  | (0.059) | (0.045) | (0.063) | (0.054) | (0.124) | (0.061) |
| N | 1,423 | 3,358 | 2,031 | 3,268 | 463 | 1,975 |

Note: * p<0.1, **p<0.05, *** p<0.01. Standard errors clustered at household level are in bracket.

Panel A reports average marginal effect from logistic estimation. Panel B are OLS estimates.

**Table A8 Heterogenous effect by educational level and household location**

|  | (1) | (2) | (3) | (4) | (5) | (6) | (7) |
| --- | --- | --- | --- | --- | --- | --- | --- |
| *Outcome Y:* | Employed | F-T employed | P-T employed | Self-employed | Home maker | Married | Grandchildren |
| *Panel A: Education Level* | | | | | | | |
| **Primary/none** (N=2,780) | 0.113 | 0.226* | -0.036 | -0.078 | 0.031 | -0.044 | 1.390 |
|  | (0.098) | (0.119) | (0.071) | (0.054) | (0.062) | (0.106) | (1.070) |
| Mean of Y | 0.768 | 0.618 | 0.098 | 0.053 | 0.079 | 0.617 | 4.70 |
| **Secondary** (N=5,737) | -0.048 | -0.100 | 0.065 | -0.013 | 0.046 | 0.128 | 1.682* |
|  | (0.073) | (0.089) | (0.056) | (0.043) | (0.045) | (0.090) | (0.904) |
| Mean of Y | 0.795 | 0.670 | 0.080 | 0.046 | 0.043 | 0.524 | 3.19 |
| **Third/higher** (N=4,920) | -0.258*** | -0.380*** | 0.026 | 0.096 | 0.089* | -0.088 | 1.857** |
|  | (0.089) | (0.125) | (0.059) | (0.064) | (0.048) | (0.107) | (0.933) |
| Mean of Y | 0.790 | 0.664 | 0.074 | 0.052 | 0.027 | 0.484 | 2.37 |
| *Panel B: Location* | | | | | | | |
| **Dublin** (N=3,286) | -0.147 | -0.244* | 0.031 | 0.067 | 0.137* | -0.219 | 1.861* |
|  | (0.116) | (0.145) | (0.088) | (0.070) | (0.080) | (0.140) | (1.106) |
| Mean of Y | 0.776 | 0.643 | 0.075 | 0.058 | 0.058 | 0.565 | 3.12 |
| **Other cities or towns** (N=3,808) | -0.121 | -0.097 | 0.013 | -0.037 | 0.046 | -0.059 | 1.083 |
|  | (0.088) | (0.106) | (0.061) | (0.050) | (0.053) | (0.102) | (0.876) |
| Mean of Y | 0.768 | 0.644 | 0.083 | 0.041 | 0.051 | 0.537 | 3.31 |
| **Rural area** (N=6,343) | 0.034 | -0.050 | 0.052 | 0.032 | -0.004 | 0.153* | 1.694** |
|  | (0.064) | (0.082) | (0.048) | (0.042) | (0.036) | (0.081) | (0.858) |
| Mean of Y | 0.805 | 0.672 | 0.083 | 0.050 | 0.033 | 0.505 | 3.18 |

Note: * p<0.1, **p<0.05, *** p<0.01. Standard errors clustered at household level are in bracket.

In Panel A, Kleinbergen-Paap F statistic are 39.25, 55.18, 38.41 respectively. In Panel B, Kleinbergen-Paap F statistic are 24.71, 48.08, 24.00

**Table A9 Heterogenous effect on financial and time transfers by educational level and location**

|  | (1) | (2) | (3) | (4) | (5) | (6) |
| --- | --- | --- | --- | --- | --- | --- |
| Outcome Y: | Lump sum | Small Transfer | Chores | Grandparenting | Transfer Received | Help Received |
| Panel A: Education level | | | | | | |
| **Primary/none** | -0.241* | -0.069 | -0.012 | -0.211 | 0.091 | -0.368* |
|  | (0.138) | (0.171) | (0.164) | (0.186) | (0.084) | (0.195) |
| N | 1,940 | 2,700 | 2,751 | 2,307 | 2,758 | 2,729 |
| Mean of Y | 0.128 | 0.385 | 0.309 | 0.645 | 0.062 | 0.355 |
| **Secondary** | 0.411*** | 0.074 | 0.067 | 0.102 | -0.065 | 0.113 |
|  | (0.155) | (0.148) | (0.135) | (0.149) | (0.069) | (0.139) |
| N | 4,385 | 5,556 | 5,648 | 4,502 | 5,707 | 5,519 |
| Mean of Y | 0.232 | 0.474 | 0.312 | 0.598 | 0.062 | 0.280 |
| **Third/higher** | 0.110 | 0.0874 | 0.161 | 0.214 | 0.013 | 0.174 |
|  | (0.171) | (0.169) | (0.168) | (0.171) | (0.074) | (0.142) |
| N | 3,820 | 4,731 | 4,820 | 3,590 | 4,889 | 4,717 |
| Mean of Y | 0.371 | 0.532 | 0.276 | 0.489 | 0.049 | 0.208 |
| Panel B: Location | | | | | | |
| **Dublin** | -0.082 | -0.188 | -0.089 | -0.129 | 0.098 | -0.073 |
|  | (0.237) | (0.248) | (0.226) | (0.217) | (0.101) | (0.199) |
| N | 2,467 | 3,169 | 3,229 | 2,557 | 3,267 | 3,144 |
| Mean of Y | 0.335 | 0.519 | 0.334 | 0.613 | 0.047 | 0.255 |
| **Other cities or towns** | 0.245 | 0.054 | 0.186 | 0.232 | -0.028 | 0.041 |
|  | (0.161) | (0.151) | (0.151) | (0.181) | (0.068) | (0.148) |
| N | 2,859 | 3,671 | 3,728 | 3,001 | 3,789 | 3,682 |
| Mean of Y | 0.259 | 0.487 | 0.299 | 0.571 | 0.054 | 0.245 |
| **Rural areas** | 0.192 | 0.137 | 0.103 | 0.004 | -0.023 | 0.063 |
|  | (0.121) | (0.129) | (0.120) | (0.123) | (0.062) | (0.123) |
| N | 4,819 | 6,147 | 6,262 | 4,841 | 6,298 | 6,139 |
| Mean of Y | 0.232 | 0.449 | 0.279 | 0.548 | 0.065 | 0.292 |

Note: * p<0.1, **p<0.05, *** p<0.01. Standard errors clustered at household level are in bracket. Kleinbergen-Paap F statistic ranges between 19.07 to 62.3.

**Table A10 Alternative specification of regression of children’s employment**

| Outcome: Full-time employment rate | (1) | (2) | (3) | (4) | (5) | (6) | (7) | (8) |
| --- | --- | --- | --- | --- | --- | --- | --- | --- |
| OLS estimate | -0.019* | -0.019** | -0.019** | -0.015 | -0.009 | -0.014 | -0.010 | -0.011 |
|  | (0.010) | (0.010) | (0.010) | (0.009) | (0.009) | (0.009) | (0.009) | (0.009) |
| IV estimate | -0.269*** | -0.233*** | -0.238*** | -0.117** | -0.096* | -0.119** | -0.142** | -0.132** |
|  | (0.059) | (0.058) | (0.059) | (0.059) | (0.058) | (0.059) | (0.057) | (0.057) |
|  |  |  |  |  |  |  |  |  |
| Reduced-form estimate | -0.053*** | -0.044*** | -0.045*** | -0.021** | -0.017* | 0.021** | -0.025** | -0.024** |
|  | (0.011) | (0.011) | (0.011) | (0.010) | (0.010) | (0.010) | (0.010) | (0.010) |
| First-stage estimate | 0.196*** | 0.190*** | 0.188*** | 0.179*** | 0.181*** | 0.179*** | 0.179*** | 0.179*** |
|  | (0.015) | (0.015) | (0.015) | (0.015) | (0.015) | (0.015) | (0.015) | (0.015) |
| Kleinbergen-Paap F | 168.0 | 157.1 | 152.8 | 136.4 | 138.9 | 137.0 | 136.5 | 137.1 |
| Individual characteristics |  |  |  |  |  |  |  |  |
| Demographics | YES | YES | YES | YES | YES | YES | YES | YES |
| Partner | NO | YES | YES | YES | YES | YES | YES | YES |
| Early childhood condition | NO | NO | YES | YES | YES | YES | YES | YES |
| Health status | NO | NO | NO | NO | YES | YES | NO | NO |
| Household assets | NO | NO | NO | NO | NO | YES | NO | NO |
| Children's characteristics |  |  |  |  |  |  |  |  |
| Number, gender, age | NO | NO | NO | YES | YES | YES | YES | YES |
| Education | NO | NO | NO | NO | NO | NO | YES | YES |
| Proximity | NO | NO | NO | NO | NO | NO | NO | YES |
| N | 13,437 | 13,437 | 13,437 | 13,437 | 13,273 | 13,437 | 13,422 | 13,421 |

Note: * p<0.1, **p<0.05, *** p<0.01. Standard errors clustered at household level are in bracket. (4) is the preferred specification.

Controls for children’s highest education are the proportions of children having a degree or above, diploma, intermediate degree, and others.

Controls for household assets are 4 quartile groups pf household assets and another indicator for the missing asset information.

Controls for health status at the first wave are all categorical variables regarding the chronic diseases (no disease, 1, 2, 3 or more), depression symptoms (none/mild, moderate, severe), and disability level (ADL only, IADL only, IADL and ADL)

Controls geographical proximity include four categorical variables: co-resident, at least one in the same county, in another county, all are in another country.

**Table A11 Alternative specification of regression of children’s fertility**

| Outcome: Number of grandchildren | (1) | (2) | (3) | (4) | (5) | (6) | (7) | (8) |
| --- | --- | --- | --- | --- | --- | --- | --- | --- |
| OLS estimate | 0.366*** | 0.276** | 0.278** | 0.114 | 0.0955 | 0.0826 | 0.108 | 0.101 |
|  | (0.111) | (0.109) | (0.109) | (0.0798) | (0.0809) | (0.0806) | (0.0789) | (0.0774) |
| IV estimate | 3.987*** | 3.226*** | 3.277*** | 1.592*** | 1.546*** | 1.523*** | 1.669*** | 1.566*** |
|  | (0.755) | (0.720) | (0.731) | (0.538) | (0.536) | (0.534) | (0.540) | (0.534) |
|  |  |  |  |  |  |  |  |  |
| Reduced-form estimate | 0.783*** | 0.613*** | 0.615*** | 0.285*** | 0.280*** | 0.276*** | 0.299*** | 0.281*** |
|  | (0.139) | (0.130) | (0.130) | (0.094) | (0.094) | (0.094) | (0.094) | (0.093) |
| First-stage estimate | 0.196*** | 0.190*** | 0.188*** | 0.179*** | 0.181*** | 0.181*** | 0.179*** | 0.179*** |
|  | (0.015) | (0.015) | (0.015) | (0.015) | (0.015) | (0.015) | (0.015) | (0.015) |
| Kleinbergen-Paap F | 167.9 | 157.1 | 152.8 | 136.4 | 138.9 | 139.4 | 136.5 | 137.0 |
| Individual characteristics |  |  |  |  |  |  |  |  |
| Demographics | YES | YES | YES | YES | YES | YES | YES | YES |
| Partner | NO | YES | YES | YES | YES | YES | YES | YES |
| Early childhood condition | NO | NO | YES | YES | YES | YES | YES | YES |
| Health status | NO | NO | NO | NO | YES | YES | NO | NO |
| Household assets | NO | NO | NO | NO | NO | YES | NO | NO |
| Children's characteristics |  |  |  |  |  |  |  |  |
| Number, gender, age | NO | NO | NO | YES | YES | YES | YES | YES |
| Education | NO | NO | NO | NO | NO | NO | YES | YES |
| Proximity | NO | NO | NO | NO | NO | NO | NO | YES |
| N | 13,437 | 13,437 | 13,437 | 13,437 | 13,273 | 13,273 | 13,422 | 13,421 |

Note: * p<0.1, **p<0.05, *** p<0.01. Standard errors clustered at household level are in bracket. (4) is the preferred specification.

Controls for children’s highest education are the proportions of children having a degree or above, diploma, intermediate degree, and others.

Controls for household assets are 4 quartile groups pf household assets and another indicator for the missing asset information.

Controls for health status at the first wave are all categorical variables regarding the chronic diseases (no disease, 1, 2, 3 or more), depression symptoms (none/mild, moderate, severe), and disability level (ADL only, IADL only, IADL and ADL)

Controls geographical proximity include four categorical variables: co-resident, at least one in the same county, in another county, all are in another country.

**Table A12 Sensitivity checks: alternative samples**

|  | (1) | (2) | (3) | (4) | (5) | (6) |
| --- | --- | --- | --- | --- | --- | --- |
|  |  | Alternative Retirement | | Alternative | Children’s age | No |
|  | Baseline | No paid work | Claim retired | Age threshold | 24-49 | Co-residence |
| Employment | -0.066 | -0.072 | -0.073* | -0.036 | -0.087* | -0.046 |
|  | (0.047) | (0.049) | (0.042) | (0.092) | (0.051) | (0.056) |
| N | 13437 | 13238 | 11844 | 13437 | 11254 | 8688 |
| F-T employment | -0.117** | -0.130** | -0.122** | 0.012 | -0.156** | -0.121* |
|  | (0.059) | (0.062) | (0.052) | (0.108) | (0.065) | (0.071) |
| N | 13437 | 13238 | 11254 | 13437 | 11254 | 8688 |
| P-T employment | 0.036 | 0.041 | 0.027 | -0.039 | 0.045 | 0.045 |
|  | (0.035) | (0.036) | (0.029) | (0.061) | (0.038) | (0.042) |
| N | 13437 | 13238 | 11844 | 13437 | 11254 | 8688 |
| Self-employment | 0.015 | 0.017 | 0.022 | -0.009 | 0.024 | 0.030 |
|  | (0.029) | (0.030) | (0.026) | (0.045) | (0.032) | (0.036) |
| N | 13437 | 13238 | 11844 | 13437 | 11254 | 8688 |
| Home maker | 0.049* | 0.045 | 0.045* | -0.051 | 0.062* | 0.064* |
|  | (0.029) | (0.030) | (0.025) | (0.042) | (0.032) | (0.036) |
| N | 13437 | 13238 | 11844 | 13437 | 11254 | 8688 |
| Married | 0.014 | 0.010 | -0.006 | 0.091 | 0.001 | -0.004 |
|  | (0.056) | (0.059) | (0.051) | (0.099) | (0.062) | (0.067) |
| N | 13437 | 13238 | 11844 | 13437 | 11254 | 8688 |
| Grandchildren | 1.592*** | 1.677*** | 1.165** | -0.262 | 1.771*** | 1.950*** |
|  | (0.538) | (0.564) | (0.469) | (0.705) | (0.586) | (0.635) |
| N | 13437 | 13238 | 11844 | 13437 | 11254 | 8688 |
| Whether has lump | 0.146* | 0.142 | 0.101 | 0.062 | 0.168* | 0.117 |
| sum transfer | (0.088) | (0.090) | (0.080) | (0.221) | (0.095) | (0.099) |
| N | 10145 | 10037 | 8943 | 10145 | 8569 | 6560 |
| Log (lump sum) | 0.116 | 0.160 | 0.126 | 0.622 | 0.128 | 0.087 |
|  | (0.427) | (0.420) | (0.403) | (1.336) | (0.443) | (0.574) |
| N | 2684 | 2647 | 2421 | 2684 | 1955 | 1603 |
| Whether has smaller | 0.060 | 0.041 | 0.038 | -0.198 | 0.046 | -0.015 |
| transfers | (0.091) | (0.095) | (0.081) | (0.191) | (0.100) | (0.107) |
| N | 12987 | 12797 | 11436 | 12987 | 10903 | 8425 |
| Log (small transfer) | -0.372 | -0.358 | -0.450* | -0.444 | -0.390 | -0.413 |
|  | (0.272) | (0.282) | (0.243) | (0.520) | (0.308) | (0.304) |
| N | 6191 | 6094 | 5509 | 6191 | 4809 | 3700 |
| Whether help chores | 0.076 | 0.093 | 0.116 | -0.334* | 0.083 | 0.036 |
|  | (0.087) | (0.091) | (0.078) | (0.180) | (0.095) | (0.103) |
| N | 13219 | 13021 | 11650 | 13219 | 11120 | 8627 |
| Log(help chores) | 0.666* | 0.746 | 0.652* | 0.264 | 0.513 | 0.541 |
|  | (0.404) | (0.461) | (0.354) | (0.534) | (0.430) | (0.447) |
| N | 3941 | 3865 | 3451 | 3941 | 3309 | 2574 |
| Whether grandparenting | 0.041 | 0.055 | 0.013 | 0.283 | 0.021 | 0.134 |
|  | (0.093) | (0.098) | (0.084) | (0.199) | (0.101) | (0.107) |
| N | 10399 | 10239 | 9115 | 10399 | 9103 | 7084 |
| Log (grandparenting) | 0.444 | 0.475 | 0.556** | 2.395** | 0.433 | 0.372 |
|  | (0.286) | (0.302) | (0.264) | (1.219) | (0.311) | (0.343) |
| N | 5936 | 5936 | 5932 | 5936 | 5415 | 4195 |

Note: * p<0.1, **p<0.05, *** p<0.01. Standard errors clustered at household level are in bracket. Models included the same control variables as per Table 2.

**Fig A1 Children's labour market status by parental age**


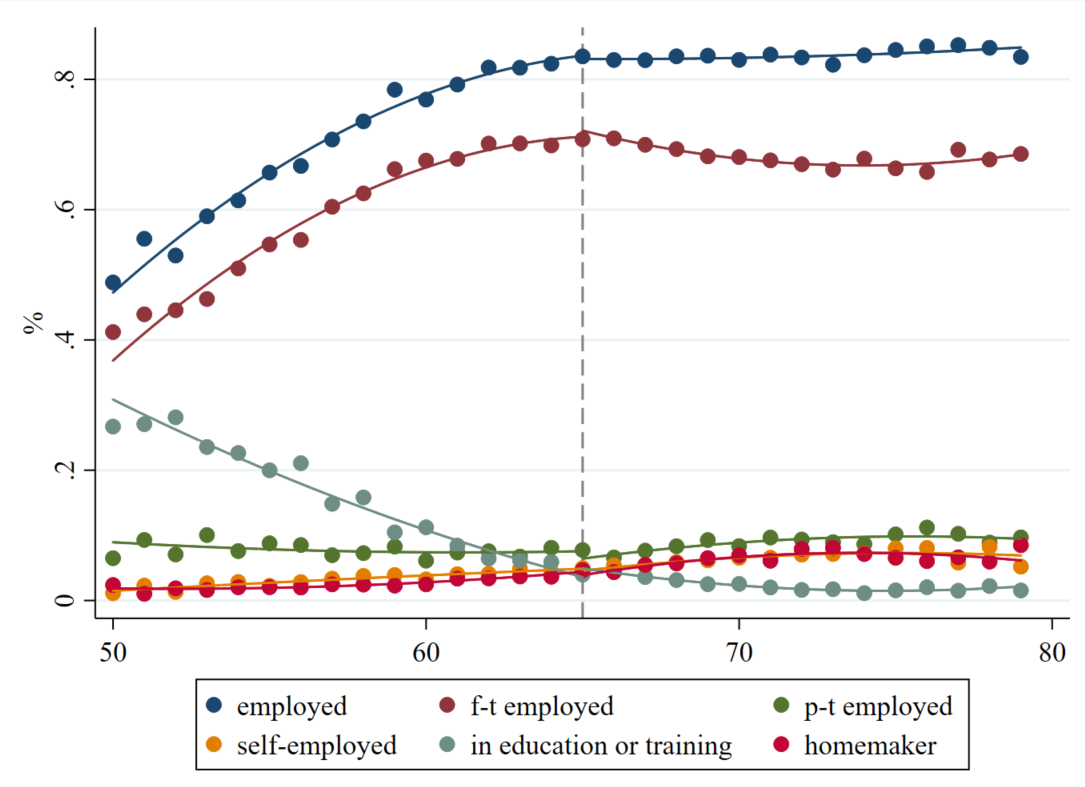


**Fig A2 Children’s marital and fertility status by parental age**


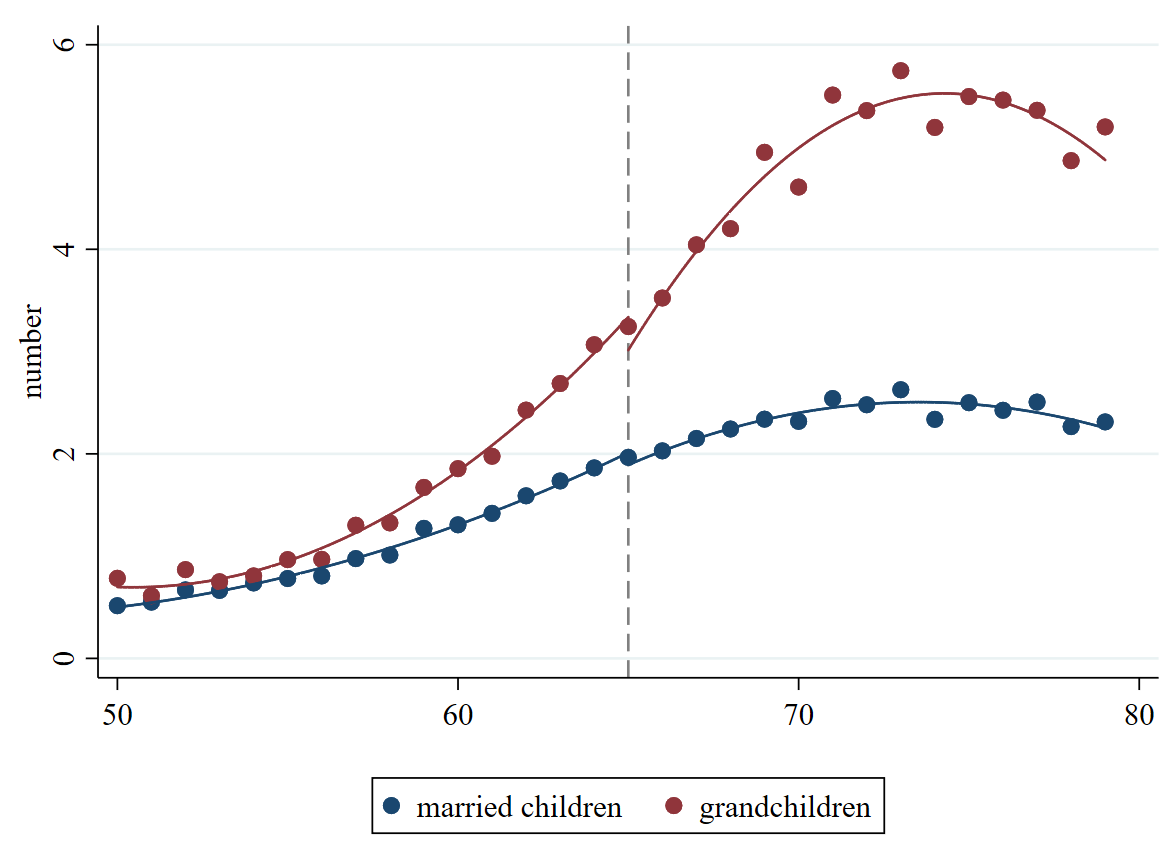


**Fig A3 Financial Transfers by age**


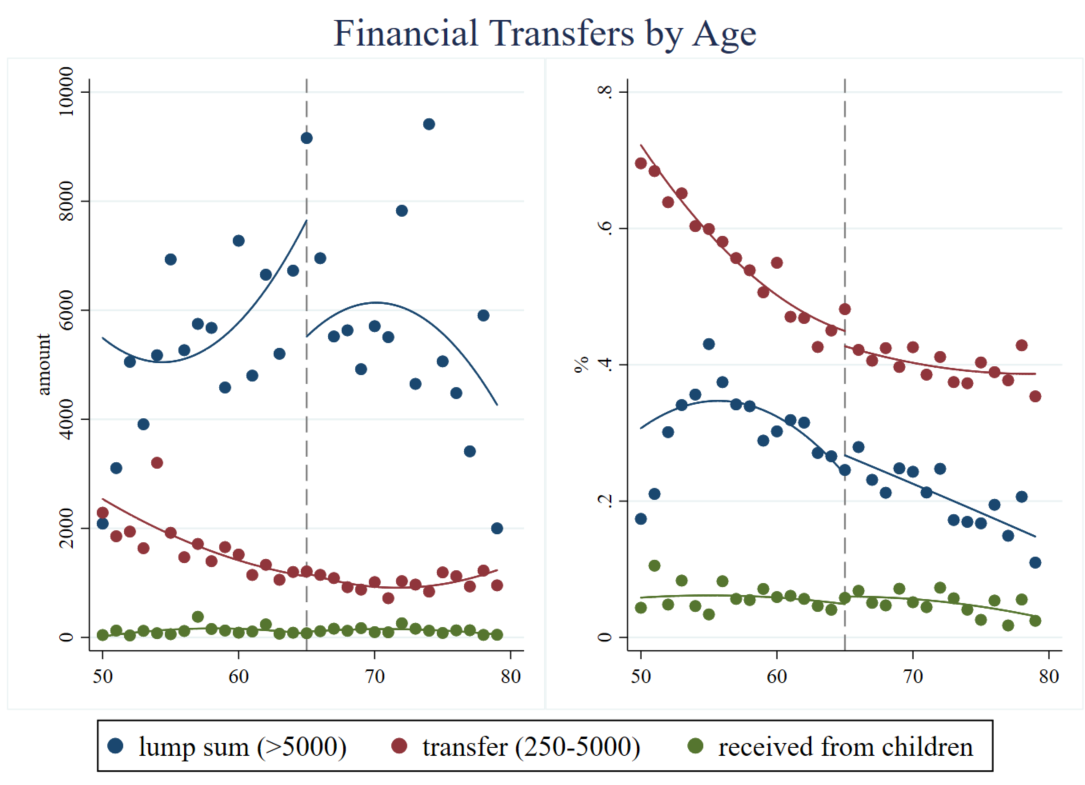


**Fig A4 Non-financial transfers by age**


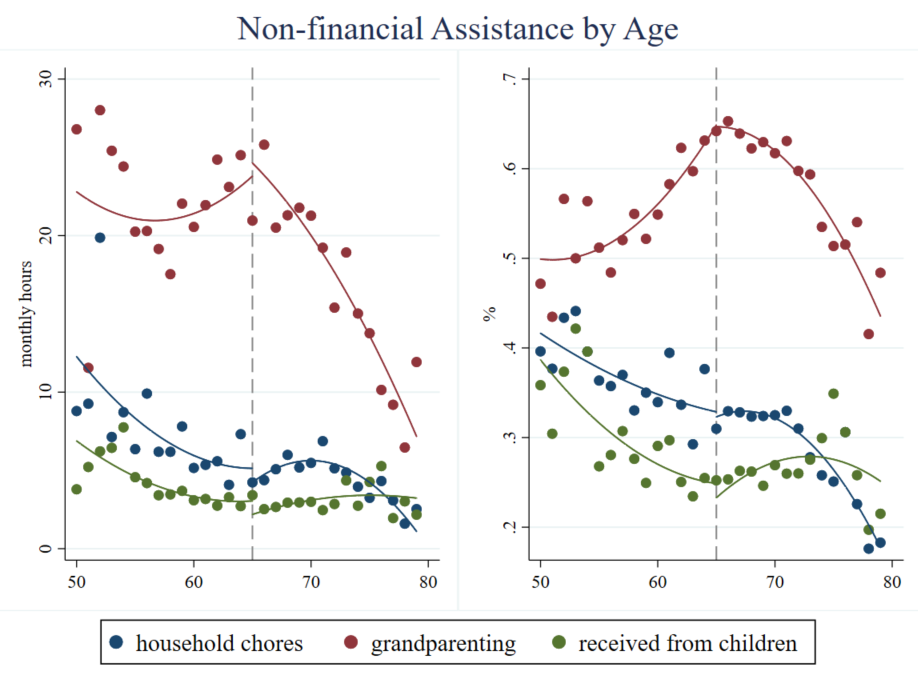

Supplement: Supplementary file 1 [file 6734e2914cb4b246af1a739d.docx]
